# Supplementary material for: Polyoxometalate-antioxidant peptide assembly materials with NIR-triggered photothermal behaviour and enhanced antibacterial activity
Source: Royal Society of Chemistry journal article supplement (doi:10.1039/c9sm01059a), 2019-01-01
Supplement: c9sm01059a1.pdf [file c9sm01059a1.pdf]

# **Polyoxometalate-Antioxidant Peptide Assembly Materials with NIR-Triggered Photothermal Behaviour and Enhanced Antibacterial Activity**

*Simin Zhang,<sup>a</sup> Bo Peng,<sup>a</sup> Peiyu Xue,<sup>a</sup> Xueping Kong,<sup>b</sup> Yue Tang,<sup>a</sup> Lixin Wu<sup>\*b</sup> and  
Songyi Lin<sup>\*a</sup>*

† National Engineering Research Center of Seafood, School of Food Science and  
Technology, Dalian Polytechnic University, Dalian 116034, P. R. China.

‡ State Key Laboratory of Supramolecular Structure and Materials, Jilin University,  
Changchun, 130012, China.

# Supporting Information

## Table of Contents

|                                              |    |
|----------------------------------------------|----|
| MS spectra.....                              | S1 |
| FT-IR spectra.....                           | S1 |
| Elemental Analysis (EA).....                 | S1 |
| Zeta potential .....                         | S2 |
| Dynamic Light Scattering (DLS) Analysis..... | S2 |
| Zeta potential .....                         | S3 |
| Cytotoxicity.....                            | S4 |
| Photothermal Behaviour.....                  | S5 |

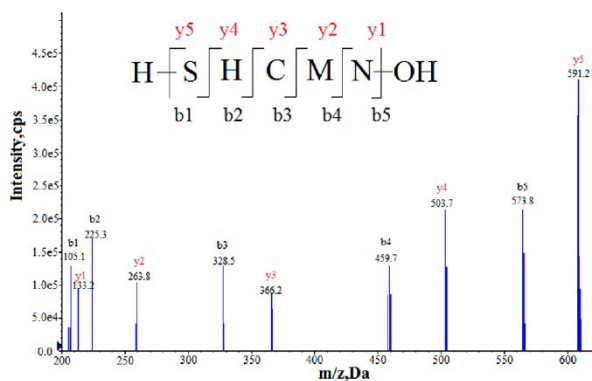

**Figure S1.** The MS spectrum of SHCMN.

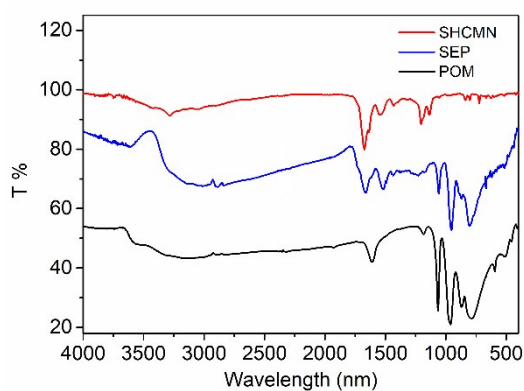

**Figure S2.** IR spectra of pure rPOM, SHCMN, and rSP in KBr pellets.

**Table S1.** The assignments of infrared spectra of rSP in solid state.

| SHCMN /cm <sup>-1</sup> | rSP /cm <sup>-1</sup> | Assignment                 | SHCMN /cm <sup>-1</sup> | rSP /cm <sup>-1</sup> | Assignment            |
|-------------------------|-----------------------|----------------------------|-------------------------|-----------------------|-----------------------|
| 3300                    | 3300                  | O-H asym. str.             | 1000–1300               | 1000–1300             | C–O, C–OH, C–N        |
| 2933                    | 2933                  | CH <sub>3</sub> asym. str. | 1203                    | 1203                  | C=S                   |
| 2823                    | 2824                  | CH <sub>2</sub> sym. str.  | 1128                    | 1128                  | C–O–C stretching      |
| 1672                    | 1672                  | -CO–NH-                    |                         | 1064                  | P–O <sub>d</sub>      |
| 1630                    | 1630                  | C=C frame str.             |                         | 967                   | v(Mo=O <sub>d</sub> ) |
| 1425                    | 1425                  | CH <sub>2</sub> scissoring |                         | 867                   | Mo–O <sub>b</sub> –Mo |
| 1350                    | 1352                  | CH <sub>2</sub> wagging    |                         | 791                   | Mo–O <sub>c</sub> –Mo |
| 1325                    | 1323                  | CH <sub>2</sub> wagging    | 722                     | 722                   | C–S                   |
| 1297                    | 1297                  | CH <sub>2</sub> twisting   |                         |                       |                       |

**Table S2.** The summary of elemental analysis for the prepared complex rSP.<sup>[a]</sup>

|            | C     | H    | N    | S    | Mo    |
|------------|-------|------|------|------|-------|
| Calcd. (%) | 10.45 | 1.46 | 4.64 | 2.66 | 47.69 |
| Found (%)  | 10.25 | 1.33 | 4.60 | 2.59 | 47.22 |

[a] The elemental analytical results of C, H, N and S were obtained from organic elemental analysis, and the elemental analysis of Mo was performed on inductive coupled plasma emission spectrometer.

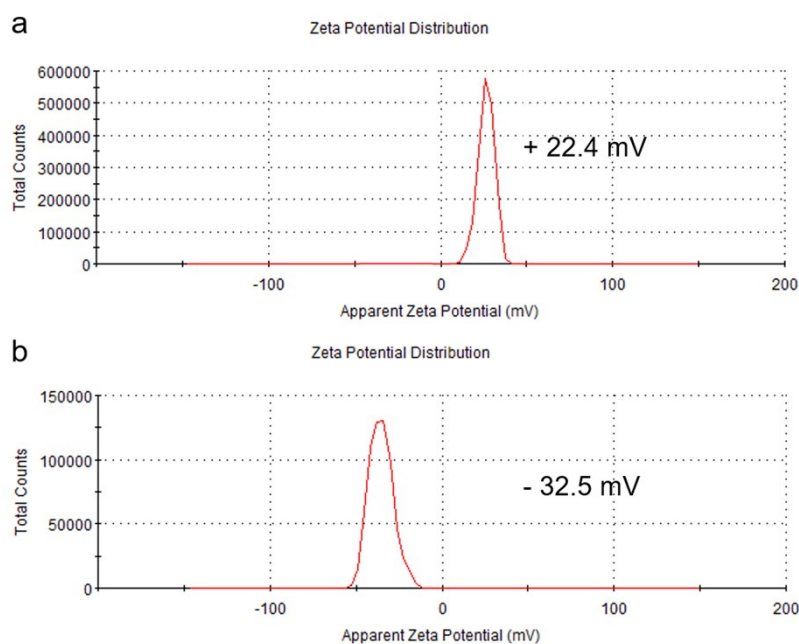

**Figure S3.** Zeta potential of (a) rSP complex and (b) pure POM in aqueous solution.

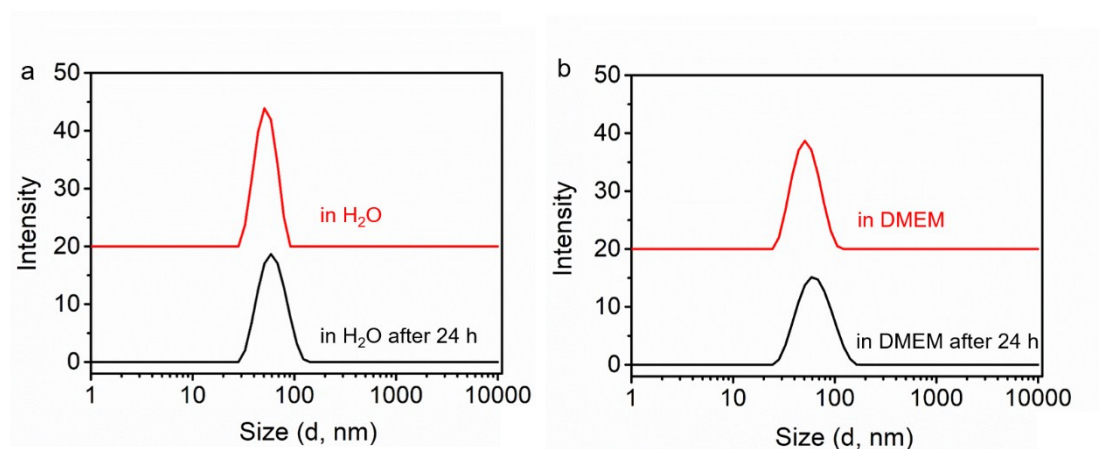

**Figure S4.** DLS curve of rSP complex in (a) aqueous solution and (b) DMEM culture media condition within 24 h.

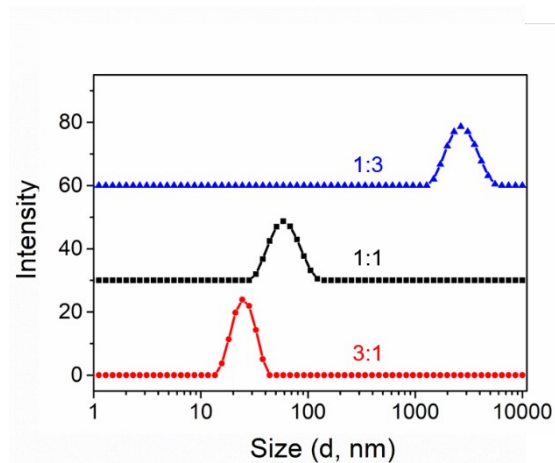

**Figure S5.** DLS curve of rSP complex solution with the ratio of peptide and POM is 3:1, 1:1 and 1:3.

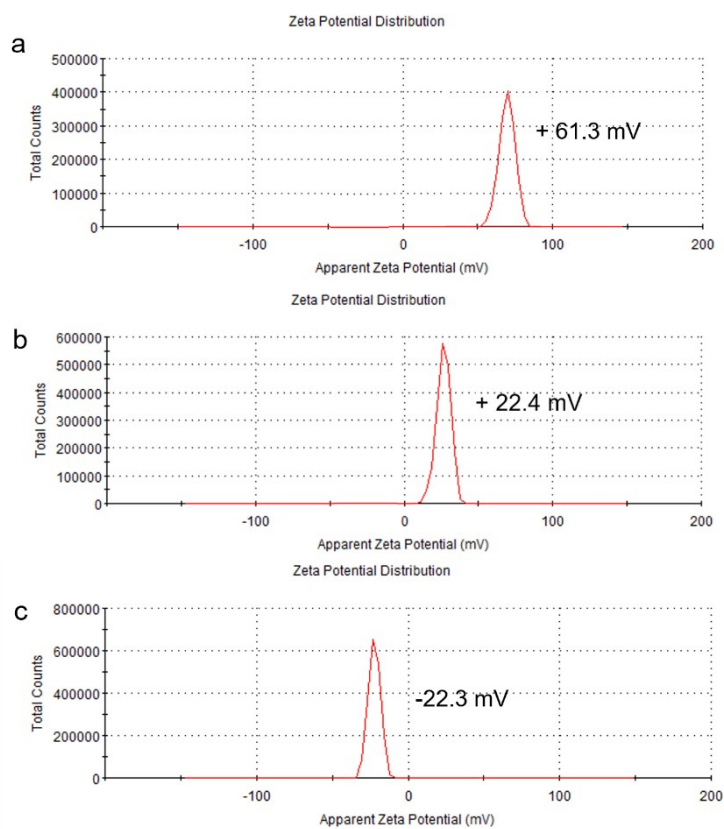

**Figure S6.** Zeta potential of rSP complex solution with the ratio of peptide and POM is (a) 3:1, (b) 1:1 and (c) 1:3.

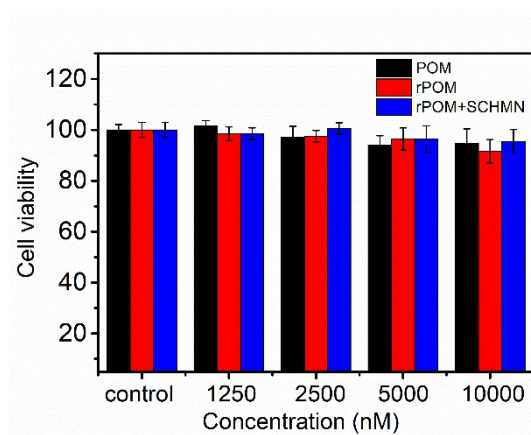

**Figure S7.** Columnar plots of viability of HepG2 cells after incubation for 24 h in the presence of POM, rPOM and rSP versus the increase in their concentrations.

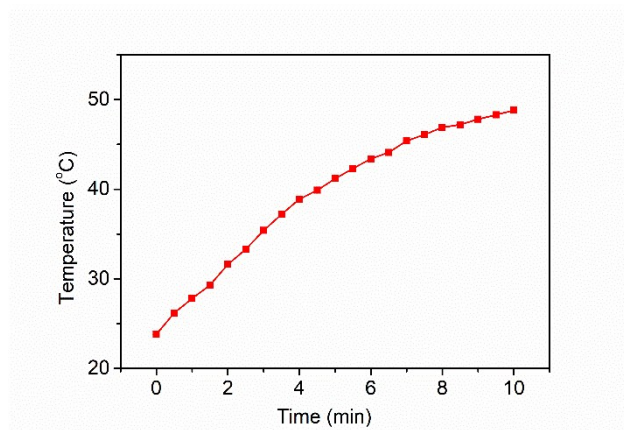

**Figure S8.** Photothermal heating curves of rSP aqueous solution under 808 nm laser irradiation at a power density of 0.5 W/cm<sup>2</sup> for 10 min.
